# Supplementary material for: Combined indicator of vitamin B12 status: modification for missing biomarkers and folate status and recommendations for revised cut-points
Source: publisher site journal article supplement (doi:10.1515/cclm-2014-0818), 2015-01-01
Supplement: Supplementary file 1 [file Calc_cB12_from_3_or_4_Markers_(2015).xls]

## Sheet: 3 or 4 Markers
Calculation of cB12 indicator (former w) from 3 or 4 markers										Vitamin B12 status classification
Further information can be obtained from:										2 = elevated B12
Sergey Fedosov (snf@mb.au.dk) or Alex Brito (abrito@ucdavis.edu)										1 = adequate B12 status
										-1 = decreased B12 (start B12 supplements)
Use either 4 or 3 markers from the list: B12, holoTC, Hcy, MMA.										-2 = possibly B12 deficient (start oral B12)
Make an input into the blue fields.										-3 = probably B12 deficient (start B12 injections)
Leave the cell empty (or enter X =< 0) if measurement is absent.
Read cB12 and diagnosis of B12 status in the red fields.
	age	folate	B12	holoTC	Hcy	MMA										if 0, then 50							W correction (W3 func. of W3,W4)							Diagnosis
ID	years	nM	pM	pM	µM	µM		ID	cB12 (w)	Diagnosis code						age	Log(B)	Log(T)	Log(H)	Log(M)	raw W	+dWfol	dW (-B)	dW (-T)	dW (-H)	dW (-M)		W		w < -2.5	-2.5 to -1.5	-1.5 to -0.5	-0.5 to 1.5	1.5 =< w		Result
Suspect5348	48		647	201	8.6	0.04		Suspect5348	1.85094	2						48	2.8109	2.3032	0.934498	-1.39794	1.85094	0	0	0	0	0		1.85094		0	0	0	0	2		2
Suspect2584	57		277	21	5.9	0.16		Suspect2584	0.097907	1						57	2.44248	1.32222	0.770852	-0.79588	0.097907	0	0	0	0	0		0.097907		0	0	0	1	0		1
Suspect9202	88		292	27	16.2	0.83		Suspect9202	-0.733794	-1						88	2.46538	1.43136	1.20952	-0.0809219	-0.733794	0	0	0	0	0		-0.733794		0	0	-1	0	0		-1
Suspect8401	74		311	65	10.5	0.23		Suspect8401	0.321538	1						74	2.49276	1.81291	1.02119	-0.638272	0.321538	0	0	0	0	0		0.321538		0	0	0	1	0		1
Suspect4136	76		655	54	7.5	0.32		Suspect4136	0.580038	1						76	2.81624	1.73239	0.875061	-0.49485	0.580038	0	0	0	0	0		0.580038		0	0	0	1	0		1
Suspect5045	47		384	72	5.1	0.23		Suspect5045	0.642436	1						47	2.58433	1.85733	0.70757	-0.638272	0.642436	0	0	0	0	0		0.642436		0	0	0	1	0		1
Suspect3455	25		93	14	5.4	0.74		Suspect3455	-1.26523	-1						25	1.96848	1.14613	0.732394	-0.130768	-1.26523	0	0	0	0	0		-1.26523		0	0	-1	0	0		-1
Suspect8672	88		321	28	9.9	0.26		Suspect8672	0.0411074	1						88	2.50651	1.44716	0.995635	-0.585027	0.0411074	0	0	0	0	0		0.0411074		0	0	0	1	0		1
Suspect8499	65		781	361	4.9	0.2		Suspect8499	1.80563	2						65	2.89265	2.55751	0.690196	-0.69897	1.80563	0	0	0	0	0		1.80563		0	0	0	0	2		2
Suspect5028	39		265	38	7	0.2		Suspect5028	0.104109	1						39	2.42325	1.57978	0.845098	-0.69897	0.104109	0	0	0	0	0		0.104109		0	0	0	1	0		1
Suspect5068	56		273	34	27.9	0.1		Suspect5068	-0.174089	1						56	2.43616	1.53148	1.4456	-1	-0.174089	0	0	0	0	0		-0.174089		0	0	0	1	0		1
Suspect5540	57		219	15	10.3	0.64		Suspect5540	-0.994302	-1						57	2.34044	1.17609	1.01284	-0.19382	-0.994302	0	0	0	0	0		-0.994302		0	0	-1	0	0		-1
Suspect425	51		197	50	10.3	1.2		Suspect425	-0.814577	-1						51	2.29447	1.69897	1.01284	0.0791812	-0.814577	0	0	0	0	0		-0.814577		0	0	-1	0	0		-1
Suspect5500	55		394	42	24.8	0.09		Suspect5500	0.16973	1						55	2.5955	1.62325	1.39445	-1.04576	0.16973	0	0	0	0	0		0.16973		0	0	0	1	0		1
Suspect8059	76		403	70	7.9	0.15		Suspect8059	0.788299	1						76	2.60531	1.8451	0.897627	-0.823909	0.788299	0	0	0	0	0		0.788299		0	0	0	1	0		1
Suspect9284	74		188	32	9.1	0.92		Suspect9284	-0.74474	-1						74	2.27416	1.50515	0.959041	-0.0362122	-0.74474	0	0	0	0	0		-0.74474		0	0	-1	0	0		-1
Suspect1594	41		362	120	6.4	0.14		Suspect1594	0.937898	1						41	2.55871	2.07918	0.80618	-0.853872	0.937898	0	0	0	0	0		0.937898		0	0	0	1	0		1
Suspect4059	69		561	100	7.7	0.28		Suspect4059	0.784014	1						69	2.74896	2	0.886491	-0.552842	0.784014	0	0	0	0	0		0.784014		0	0	0	1	0		1
Suspect5077	25		179	44	9.6	0.27		Suspect5077	-0.295541	1						25	2.25285	1.64345	0.982271	-0.568636	-0.295541	0	0	0	0	0		-0.295541		0	0	0	1	0		1
Suspect8235	50		214	64	4.7	0.24		Suspect8235	0.364645	1						50	2.33041	1.80618	0.672098	-0.619789	0.364645	0	0	0	0	0		0.364645		0	0	0	1	0		1
Suspect8678	53		243	59	9.9	0.27		Suspect8678	0.0210816	1						53	2.38561	1.77085	0.995635	-0.568636	0.0210816	0	0	0	0	0		0.0210816		0	0	0	1	0		1
Suspect9137	75		209	61	9.8	0.35		Suspect9137	-0.0246769	1						75	2.32015	1.78533	0.991226	-0.455932	-0.0246769	0	0	0	0	0		-0.0246769		0	0	0	1	0		1
Suspect9262	49		170	5.4	10.9	0.49		Suspect9262	-1.48796	-1						49	2.23045	0.732394	1.03743	-0.309804	-1.48796	0	0	0	0	0		-1.48796		0	0	-1	0	0		-1
Suspect9310	82		251	31	11.9	0.59		Suspect9310	-0.502532	-1						82	2.39967	1.49136	1.07555	-0.229148	-0.502532	0	0	0	0	0		-0.502532		0	0	-1	0	0		-1
Suspect5012	39		309	64	4.9	0.11		Suspect5012	0.811757	1						39	2.48996	1.80618	0.690196	-0.958607	0.811757	0	0	0	0	0		0.811757		0	0	0	1	0		1
Suspect5574	41		206	43	6.9	0.04		Suspect5574	0.758743	1						41	2.31387	1.63347	0.838849	-1.39794	0.758743	0	0	0	0	0		0.758743		0	0	0	1	0		1
Suspect8326	43		222	33	8.7	0.43		Suspect8326	-0.450296	1						43	2.34635	1.51851	0.939519	-0.366532	-0.450296	0	0	0	0	0		-0.450296		0	0	0	1	0		1
Suspect8579	88		266	55	21.6	2.5		Suspect8579	-1.0691	-1						88	2.42488	1.74036	1.33445	0.39794	-1.0691	0	0	0	0	0		-1.0691		0	0	-1	0	0		-1
Suspect8718	35		271	65	5.3	0.2		Suspect8718	0.458727	1						35	2.43297	1.81291	0.724276	-0.69897	0.458727	0	0	0	0	0		0.458727		0	0	0	1	0		1
Suspect8748	55		562	139	9.1	0.22		Suspect8748	0.890966	1						55	2.74974	2.14301	0.959041	-0.657577	0.890966	0	0	0	0	0		0.890966		0	0	0	1	0		1
Suspect9157	73		355	81	6	0.47		Suspect9157	0.401	1						73	2.55023	1.90849	0.778151	-0.327902	0.401	0	0	0	0	0		0.401		0	0	0	1	0		1
Suspect596	86		84	14	16.2	0.51		Suspect596	-1.36414	-1						86	1.92428	1.14613	1.20952	-0.29243	-1.36414	0	0	0	0	0		-1.36414		0	0	-1	0	0		-1
Suspect5467	60		210	37	6.6	0.24		Suspect5467	0.0124395	1						60	2.32222	1.5682	0.819544	-0.619789	0.0124395	0	0	0	0	0		0.0124395		0	0	0	1	0		1
Suspect8079	41		348	63	5.8	0.16		Suspect8079	0.625688	1						41	2.54158	1.79934	0.763428	-0.79588	0.625688	0	0	0	0	0		0.625688		0	0	0	1	0		1
Suspect8252	37		234	32	6.6	0.47		Suspect8252	-0.374787	1						37	2.36922	1.50515	0.819544	-0.327902	-0.374787	0	0	0	0	0		-0.374787		0	0	0	1	0		1
Suspect8754	43		733	230	4.1	0.12		Suspect8754	1.79269	2						43	2.8651	2.36173	0.612784	-0.920819	1.79269	0	0	0	0	0		1.79269		0	0	0	0	2		2
Suspect5010	22		261	41	4.1	0.14		Suspect5010	0.488975	1						22	2.41664	1.61278	0.612784	-0.853872	0.488975	0	0	0	0	0		0.488975		0	0	0	1	0		1
Suspect5265	28		200	54	3.4	0.21		Suspect5265	0.405536	1						28	2.30103	1.73239	0.531479	-0.677781	0.405536	0	0	0	0	0		0.405536		0	0	0	1	0		1
Suspect5428	50		345	46	13.7	0.12		Suspect5428	0.265036	1						50	2.53782	1.66276	1.13672	-0.920819	0.265036	0	0	0	0	0		0.265036		0	0	0	1	0		1
Suspect8145	78		195	41	8.7	0.73		Suspect8145	-0.475121	1						78	2.29003	1.61278	0.939519	-0.136677	-0.475121	0	0	0	0	0		-0.475121		0	0	0	1	0		1
Suspect8269	74		314	41	10.3	0.26		Suspect8269	0.0806845	1						74	2.49693	1.61278	1.01284	-0.585027	0.0806845	0	0	0	0	0		0.0806845		0	0	0	1	0		1
