# Supplementary material for: Combined indicator of vitamin B12 status: modification for missing biomarkers and folate status and recommendations for revised cut-points
Source: publisher site journal article supplement (doi:10.1515/cclm-2014-0818), 2015-01-01
Supplement: Supplementary file 3 [file Calc_cB12_from_B12_&_Hcy_(2015).xls]

## Sheet: B12 & Hcy
Calculation of cB12 indicator (former w) from B12 & Hcy									Vitamin B12 status classification
Further information can be obtained from:									2 = elevated B12
Sergey Fedosov (snf@mb.au.dk) or Alex Brito (abrito@ucdavis.edu)									1 = adequate B12 status
									-1 = decreased B12 (start B12 supplements)
Use B12 and Hcy.									-2 = possibly B12 deficient (start oral B12)
Make an input into the blue fields.									-3 = probably B12 deficient (start B12 injections)
Leave age & folate cells empty (or enter X =< 0) if measurements are absent.
Read cB12 and diagnosis of B12 status in the red fields.
	age	folate	B12	Hcy											if 0, then 50							Diagnosis
ID	years	nM	pM	µM			ID	cB12 (w)	Diagnosis code						age	Log(B/H)	Log(T/M)	raw W	+dWfol	W correct		w < -2.5	-2.5 to -1.5	-1.5 to -0.5	-0.5 to 1.5	1.5 =< w		Result
Suspect5348	48		647	8.6			Suspect5348	1.07857	1						48	1.87641	2.82838	0.978176	0	1.07857		0	0	0	1	0		1
Suspect2584	57		277	5.9			Suspect2584	0.725982	1						57	1.67163	2.68387	0.663674	0	0.725982		0	0	0	1	0		1
Suspect9202	88		292	16.2			Suspect9202	0.0942897	1						88	1.25587	2.3463	0.100217	0	0.0942897		0	0	0	1	0		1
Suspect8401	74		311	10.5			Suspect8401	0.446076	1						74	1.47157	2.54365	0.414004	0	0.446076		0	0	0	1	0		1
Suspect4136	76		655	7.5			Suspect4136	1.52343	2						76	1.94118	3.02219	1.37498	0	1.52343		0	0	0	0	2		2
Suspect5045	47		384	5.1			Suspect5045	1.07044	1						47	1.87676	2.82409	0.970923	0	1.07044		0	0	0	1	0		1
Suspect3455	25		93	5.4			Suspect3455	-0.344325	1						25	1.23609	2.2511	-0.291018	0	-0.344325		0	0	0	1	0		1
Suspect8672	88		321	9.9			Suspect8672	0.686823	1						88	1.51087	2.61982	0.628745	0	0.686823		0	0	0	1	0		1
Suspect8499	65		781	4.9			Suspect8499	1.961	2						65	2.20245	3.21613	1.76528	0	1.961		0	0	0	0	2		2
Suspect5028	39		265	7			Suspect5028	0.397234	1						39	1.57815	2.54508	0.370437	0	0.397234		0	0	0	1	0		1
Suspect5068	56		273	27.9			Suspect5068	-0.735048	-1						56	0.990558	2.06603	-0.639535	0	-0.735048		0	0	-1	0	0		-1
Suspect5540	57		219	10.3			Suspect5540	-0.00964944	1						57	1.32761	2.37172	0.00750556	0	-0.00964944		0	0	0	1	0		1
Suspect425	51		197	10.3			Suspect425	-0.144599	1						51	1.28163	2.3215	-0.112867	0	-0.144599		0	0	0	1	0		1
Suspect5500	55		394	24.8			Suspect5500	-0.292026	1						55	1.20104	2.25491	-0.244369	0	-0.292026		0	0	0	1	0		1
Suspect8059	76		403	7.9			Suspect8059	0.997603	1						76	1.70768	2.78666	0.905954	0	0.997603		0	0	0	1	0		1
Suspect9284	74		188	9.1			Suspect9284	0.0956255	1						74	1.31512	2.38751	0.101409	0	0.0956255		0	0	0	1	0		1
Suspect1594	41		362	6.4			Suspect1594	0.76589	1						41	1.75253	2.69443	0.699271	0	0.76589		0	0	0	1	0		1
Suspect4059	69		561	7.7			Suspect4059	1.26265	1						69	1.86247	2.9112	1.14237	0	1.26265		0	0	0	1	0		1
Suspect5077	25		179	9.6			Suspect5077	-0.277166	1						25	1.27058	2.27652	-0.231114	0	-0.277166		0	0	0	1	0		1
Suspect8235	50		214	4.7			Suspect8235	0.639446	1						50	1.65832	2.64781	0.586486	0	0.639446		0	0	0	1	0		1
Suspect8678	53		243	9.9			Suspect8678	0.096198	1						53	1.38997	2.42033	0.101919	0	0.096198		0	0	0	1	0		1
Suspect9137	75		209	9.8			Suspect9137	0.135546	1						75	1.32892	2.40296	0.137017	0	0.135546		0	0	0	1	0		1
Suspect9262	49		170	10.9			Suspect9262	-0.341061	1						49	1.19302	2.24205	-0.288107	0	-0.341061		0	0	0	1	0		1
Suspect9310	82		251	11.9			Suspect9310	0.191145	1						82	1.32413	2.40965	0.18661	0	0.191145		0	0	0	1	0		1
Suspect5012	39		309	4.9			Suspect5012	0.847274	1						39	1.79976	2.72489	0.771864	0	0.847274		0	0	0	1	0		1
Suspect5574	41		206	6.9			Suspect5574	0.199022	1						41	1.47502	2.4663	0.193636	0	0.199022		0	0	0	1	0		1
Suspect8326	43		222	8.7			Suspect8326	0.0705912	1						43	1.40683	2.41442	0.0790786	0	0.0705912		0	0	0	1	0		1
Suspect8579	88		266	21.6			Suspect8579	-0.290133	1						88	1.09043	2.16884	-0.24268	0	-0.290133		0	0	0	1	0		1
Suspect8718	35		271	5.3			Suspect8718	0.635618	1						35	1.70869	2.63623	0.583071	0	0.635618		0	0	0	1	0		1
Suspect8748	55		562	9.1			Suspect8748	0.961793	1						55	1.79069	2.78364	0.874013	0	0.961793		0	0	0	1	0		1
Suspect9157	73		355	6			Suspect9157	1.10767	1						73	1.77208	2.83952	1.00414	0	1.10767		0	0	0	1	0		1
Suspect596	86		84	16.2			Suspect596	-1.17683	-1						86	0.714764	1.7691	-1.0336	0	-1.17683		0	0	-1	0	0		-1
Suspect5467	60		210	6.6			Suspect5467	0.388675	1						60	1.50268	2.53835	0.362803	0	0.388675		0	0	0	1	0		1
Suspect8079	41		348	5.8			Suspect8079	0.818229	1						41	1.77815	2.71549	0.745956	0	0.818229		0	0	0	1	0		1
Suspect8252	37		234	6.6			Suspect8252	0.327735	1						37	1.54967	2.51628	0.308445	0	0.327735		0	0	0	1	0		1
Suspect8754	43		733	4.1			Suspect8754	1.80777	2						43	2.25232	3.11846	1.6286	0	1.80777		0	0	0	0	2		2
Suspect5010	22		261	4.1			Suspect5010	0.743286	1						22	1.80386	2.65679	0.679109	0	0.743286		0	0	0	1	0		1
Suspect5265	28		200	3.4			Suspect5265	0.712377	1						28	1.76955	2.65618	0.651539	0	0.712377		0	0	0	1	0		1
Suspect5428	50		345	13.7			Suspect5428	0.100192	1						50	1.4011	2.42402	0.105482	0	0.100192		0	0	0	1	0		1
Suspect8145	78		195	8.7			Suspect8145	0.212203	1						78	1.35052	2.42998	0.205394	0	0.212203		0	0	0	1	0		1
Suspect8269	74		314	10.3			Suspect8269	0.474124	1						74	1.48409	2.55615	0.439022	0	0.474124		0	0	0	1	0		1
