# Supplementary material for: Combined indicator of vitamin B12 status: modification for missing biomarkers and folate status and recommendations for revised cut-points
Source: publisher site journal article supplement (doi:10.1515/cclm-2014-0818), 2015-01-01
Supplement: Supplementary file 5 [file Calc_cB12_from_B12_&_MMA_(2015).xls]

## Sheet: B12 & MMA
Calculation of cB12 indicator (former w) from B12 & MMA								Vitamin B12 status classification
Further information can be obtained from:								2 = elevated B12
Sergey Fedosov (snf@mb.au.dk) or Alex Brito (abrito@ucdavis.edu)								1 = adequate B12 status
								-1 = decreased B12 (start B12 supplements)
Use B12 and MMA.								-2 = possibly B12 deficient (start oral B12)
Make an input into the blue fields. Correction for folate is unnecessary.								-3 = probably B12 deficient (start B12 injections)
Leave age cells empty (or enter X =< 0) if measurements are absent.
Read cB12 and diagnosis of B12 status in the red fields.
	age	B12	MMA											if 0, then 50							Diagnosis
ID	years	pM	µM			ID	cB12 (w)	Diagnosis code						age	Log(B/M)	Log(T/H)	raw W		W correct		w < -2.5	-2.5 to -1.5	-1.5 to -0.5	-0.5 to 1.5	1.5 =< w		Result
Suspect5348	48	647	0.04			Suspect5348	2.02103	2						48	4.20884	1.42116	1.9034		2.02103		0	0	0	0	2		2
Suspect2584	57	277	0.16			Suspect2584	0.394754	1						57	3.23836	0.832781	0.379321		0.394754		0	0	0	1	0		1
Suspect9202	88	292	0.83			Suspect9202	-0.56903	-1						88	2.5463	0.431745	-0.523898		-0.56903		0	0	-1	0	0		-1
Suspect8401	74	311	0.23			Suspect8401	0.320355	1						74	3.13103	0.779783	0.309597		0.320355		0	0	0	1	0		1
Suspect4136	76	655	0.32			Suspect4136	0.645621	1						76	3.31109	0.891717	0.614423		0.645621		0	0	0	1	0		1
Suspect5045	47	384	0.23			Suspect5045	0.318917	1						47	3.2226	0.815575	0.308249		0.318917		0	0	0	1	0		1
Suspect3455	25	93	0.74			Suspect3455	-1.68411	-2						25	2.09925	0.110059	-1.5689		-1.68411		0	-2	0	0	0		-2
Suspect8672	88	321	0.26			Suspect8672	0.369552	1						88	3.09153	0.766118	0.355702		0.369552		0	0	0	1	0		1
Suspect8499	65	781	0.2			Suspect8499	1.05042	1						65	3.59162	1.05546	0.993782		1.05042		0	0	0	1	0		1
Suspect5028	39	265	0.2			Suspect5028	0.11527	1						39	3.12222	0.747976	0.117399		0.11527		0	0	0	1	0		1
Suspect5068	56	273	0.1			Suspect5068	0.729862	1						56	3.43616	0.953334	0.69337		0.729862		0	0	0	1	0		1
Suspect5540	57	219	0.64			Suspect5540	-0.817313	-1						57	2.53426	0.400978	-0.756578		-0.817313		0	0	-1	0	0		-1
Suspect425	51	197	1.2			Suspect425	-1.39704	-1						51	2.21528	0.200831	-1.29988		-1.39704		0	0	-1	0	0		-1
Suspect5500	55	394	0.09			Suspect5500	1.07764	1						55	3.64125	1.07836	1.01929		1.07764		0	0	0	1	0		1
Suspect8059	76	403	0.15			Suspect8059	0.848963	1						76	3.42921	0.964158	0.804986		0.848963		0	0	0	1	0		1
Suspect9284	74	188	0.92			Suspect9284	-1.09238	-1						74	2.31037	0.276492	-1.01436		-1.09238		0	0	-1	0	0		-1
Suspect1594	41	362	0.14			Suspect1594	0.62218	1						41	3.41258	0.927558	0.592455		0.62218		0	0	0	1	0		1
Suspect4059	69	561	0.28			Suspect4059	0.578208	1						69	3.3018	0.880742	0.551247		0.578208		0	0	0	1	0		1
Suspect5077	25	179	0.27			Suspect5077	-0.440809	1						25	2.82149	0.552989	-0.403734		-0.440809		0	0	0	1	0		1
Suspect8235	50	214	0.24			Suspect8235	-0.136614	1						50	2.9502	0.650782	-0.118655		-0.136614		0	0	0	1	0		1
Suspect8678	53	243	0.27			Suspect8678	-0.115228	1						53	2.95424	0.655522	-0.0986128		-0.115228		0	0	0	1	0		1
Suspect9137	75	209	0.35			Suspect9137	-0.283091	1						75	2.77608	0.562853	-0.255928		-0.283091		0	0	0	1	0		1
Suspect9262	49	170	0.49			Suspect9262	-0.846901	-1						49	2.54025	0.398616	-0.784307		-0.846901		0	0	-1	0	0		-1
Suspect9310	82	251	0.59			Suspect9310	-0.480064	1						82	2.62882	0.477824	-0.440522		-0.480064		0	0	0	1	0		1
Suspect5012	39	309	0.11			Suspect5012	0.677065	1						39	3.44857	0.948118	0.643891		0.677065		0	0	0	1	0		1
Suspect5574	41	206	0.04			Suspect5574	1.13728	1						41	3.71181	1.11107	1.07519		1.13728		0	0	0	1	0		1
Suspect8326	43	222	0.43			Suspect8326	-0.574827	-1						43	2.71288	0.499961	-0.52933		-0.574827		0	0	-1	0	0		-1
Suspect8579	88	266	2.5			Suspect8579	-1.46309	-1						88	2.02694	0.113233	-1.36177		-1.46309		0	0	-1	0	0		-1
Suspect8718	35	271	0.2			Suspect8718	0.119124	1						35	3.13194	0.750922	0.121012		0.119124		0	0	0	1	0		1
Suspect8748	55	562	0.22			Suspect8748	0.674919	1						55	3.40731	0.934887	0.64188		0.674919		0	0	0	1	0		1
Suspect9157	73	355	0.47			Suspect9157	-0.122473	1						73	2.87813	0.62393	-0.105403		-0.122473		0	0	0	1	0		1
Suspect596	86	84	0.51			Suspect596	-1.15457	-1						86	2.21671	0.228104	-1.07265		-1.15457		0	0	-1	0	0		-1
Suspect5467	60	210	0.24			Suspect5467	-0.0984815	1						60	2.94201	0.653299	-0.0829191		-0.0984815		0	0	0	1	0		1
Suspect8079	41	348	0.16			Suspect8079	0.492862	1						41	3.33746	0.881488	0.471263		0.492862		0	0	0	1	0		1
Suspect8252	37	234	0.47			Suspect8252	-0.623161	-1						37	2.69712	0.485766	-0.574627		-0.623161		0	0	-1	0	0		-1
Suspect8754	43	733	0.12			Suspect8754	1.27236	1						43	3.78592	1.15803	1.20177		1.27236		0	0	0	1	0		1
Suspect5010	22	261	0.14			Suspect5010	0.3262	1						22	3.27051	0.8261	0.315074		0.3262		0	0	0	1	0		1
Suspect5265	28	200	0.21			Suspect5265	-0.163281	1						28	2.97881	0.651733	-0.143646		-0.163281		0	0	0	1	0		1
Suspect5428	50	345	0.12			Suspect5428	0.738634	1						50	3.45864	0.962592	0.70159		0.738634		0	0	0	1	0		1
Suspect8145	78	195	0.73			Suspect8145	-0.861008	-1						78	2.42671	0.350859	-0.797527		-0.861008		0	0	-1	0	0		-1
Suspect8269	74	314	0.26			Suspect8269	0.235872	1						74	3.08196	0.749686	0.230424		0.235872		0	0	0	1	0		1
