# Supplementary material for: Combined indicator of vitamin B12 status: modification for missing biomarkers and folate status and recommendations for revised cut-points
Source: publisher site journal article supplement (doi:10.1515/cclm-2014-0818), 2015-01-01
Supplement: Supplementary file 7 [file Calc_cB12_from_B12_&_holoTC_(2015).xls]

## Sheet: B12 & Hcy
Calculation of cB12 indicator from B12 & holoTC								Vitamin B12 status classification
Further information can be obtained from:								2 = elevated B12
Sergey Fedosov (snf@mb.au.dk) or Alex Brito (abrito@ucdavis.edu)								1 = adequate B12 status
								-1 = decreased B12 (start B12 supplements)
Use B12 and holoTC.								-2 = possibly B12 deficient (start oral B12)
Make an input into the blue fields. Correction for folate is unnecessary.								-3 = probably B12 deficient (start B12 injections)
Leave age cells empty (or enter X =< 0) if measurements are absent.
Read cB12 and diagnosis of B12 status in the red fields.
	age	B12	holoTC											if 0, then 50							Diagnosis
ID	years	pM	pM			ID	cB12 (w)	Diagnosis						age	Log(B*T)	Log(1/T/M)	raw W		W correct		w < -2.5	-2.5 to -1.5	-1.5 to -0.5	-0.5 to 1.5	1.5 =< w		Result
Suspect5348	48	647	201			Suspect5348	1.46318	1						48	5.1141	0.0118889	1.39938		1.46318		0	0	0	1	0		1
Suspect2584	57	277	21			Suspect2584	-0.464922	1						57	3.7647	-0.494742	-0.421863		-0.464922		0	0	0	1	0		1
Suspect9202	88	292	27			Suspect9202	-0.344454	1						88	3.89675	-0.708232	-0.313433		-0.344454		0	0	0	1	0		1
Suspect8401	74	311	65			Suspect8401	0.319178	1						74	4.30567	-0.40776	0.296695		0.319178		0	0	0	1	0		1
Suspect4136	76	655	54			Suspect4136	0.65396	1						76	4.54864	-0.347534	0.612716		0.65396		0	0	0	1	0		1
Suspect5045	47	384	72			Suspect5045	0.587476	1						47	4.44166	-0.162216	0.549519		0.587476		0	0	0	1	0		1
Suspect3455	25	93	14			Suspect3455	-1.59568	-2						25	3.11461	-0.741189	-1.40479		-1.59568		0	-2	0	0	0		-2
Suspect8672	88	321	28			Suspect8672	-0.25389	1						88	3.95366	-0.683164	-0.231449		-0.25389		0	0	0	1	0		1
Suspect8499	65	781	361			Suspect8499	1.82351	2						65	5.45016	-0.0368191	1.76004		1.82351		0	0	0	0	2		2
Suspect5028	39	265	38			Suspect5028	-0.0338975	1						39	4.00303	-0.280851	-0.0306139		-0.0338975		0	0	0	1	0		1
Suspect5068	56	273	34			Suspect5068	-0.135081	1						56	3.96764	-0.394797	-0.123282		-0.135081		0	0	0	1	0		1
Suspect5540	57	219	15			Suspect5540	-0.894673	-1						57	3.51654	-0.627563	-0.802848		-0.894673		0	0	-1	0	0		-1
Suspect425	51	197	50			Suspect425	-0.0807812	1						51	3.99344	-0.351057	-0.0736146		-0.0807812		0	0	0	1	0		1
Suspect5500	55	394	42			Suspect5500	0.247622	1						55	4.21875	-0.288559	0.229866		0.247622		0	0	0	1	0		1
Suspect8059	76	403	70			Suspect8059	0.518339	1						76	4.4504	-0.377987	0.48403		0.518339		0	0	0	1	0		1
Suspect9284	74	188	32			Suspect9284	-0.49183	1						74	3.77931	-0.624074	-0.445984		-0.49183		0	0	0	1	0		1
Suspect1594	41	362	120			Suspect1594	0.870259	1						41	4.63789	-0.0703776	0.819829		0.870259		0	0	0	1	0		1
Suspect4059	69	561	100			Suspect4059	0.942433	1						69	4.74896	-0.228213	0.88945		0.942433		0	0	0	1	0		1
Suspect5077	25	179	44			Suspect5077	-0.168881	1						25	3.89631	-0.272219	-0.154125		-0.168881		0	0	0	1	0		1
Suspect8235	50	214	64			Suspect8235	0.139904	1						50	4.13659	-0.287217	0.129737		0.139904		0	0	0	1	0		1
Suspect8678	53	243	59			Suspect8678	0.161243	1						53	4.15646	-0.298553	0.149528		0.161243		0	0	0	1	0		1
Suspect9137	75	209	61			Suspect9137	0.0209469	1						75	4.10548	-0.490792	0.0198254		0.0209469		0	0	0	1	0		1
Suspect9262	49	170	5.4			Suspect9262	-1.9979	-2						49	2.96284	-0.978912	-1.73925		-1.9979		0	-2	0	0	0		-2
Suspect9310	82	251	31			Suspect9310	-0.33449	1						82	3.89104	-0.6483	-0.304433		-0.33449		0	0	0	1	0		1
Suspect5012	39	309	64			Suspect5012	0.402259	1						39	4.29614	-0.16874	0.374606		0.402259		0	0	0	1	0		1
Suspect5574	41	206	43			Suspect5574	-0.125739	1						41	3.94734	-0.3144	-0.114748		-0.125739		0	0	0	1	0		1
Suspect8326	43	222	33			Suspect8326	-0.261977	1						43	3.86487	-0.361477	-0.238786		-0.261977		0	0	0	1	0		1
Suspect8579	88	266	55			Suspect8579	0.070674	1						88	4.16524	-0.597611	0.0656866		0.070674		0	0	0	1	0		1
Suspect8718	35	271	65			Suspect8718	0.339387	1						35	4.24588	-0.168418	0.315615		0.339387		0	0	0	1	0		1
Suspect8748	55	562	139			Suspect8748	1.1672	1						55	4.89275	-0.0845172	1.10791		1.1672		0	0	0	1	0		1
Suspect9157	73	355	81			Suspect9157	0.538703	1						73	4.45871	-0.347954	0.503295		0.538703		0	0	0	1	0		1
Suspect596	86	84	14			Suspect596	-1.87632	-2						86	3.07041	-1.19194	-1.639		-1.87632		0	-2	0	0	0		-2
Suspect5467	60	210	37			Suspect5467	-0.268787	1						60	3.89042	-0.457156	-0.244962		-0.268787		0	0	0	1	0		1
Suspect8079	41	348	63			Suspect8079	0.461238	1						41	4.34092	-0.163116	0.43012		0.461238		0	0	0	1	0		1
Suspect8252	37	234	32			Suspect8252	-0.23123	1						37	3.87437	-0.327726	-0.210872		-0.23123		0	0	0	1	0		1
Suspect8754	43	733	230			Suspect8754	1.61329	2						43	5.22683	0.0641933	1.54885		1.61329		0	0	0	0	2		2
Suspect5010	22	261	41			Suspect5010	0.0445045	1						22	4.02942	-0.20635	0.0415364		0.0445045		0	0	0	1	0		1
Suspect5265	28	200	54			Suspect5265	0.0386588	1						28	4.03342	-0.223088	0.0361464		0.0386588		0	0	0	1	0		1
Suspect5428	50	345	46			Suspect5428	0.234743	1						50	4.20058	-0.263074	0.217864		0.234743		0	0	0	1	0		1
Suspect8145	78	195	41			Suspect8145	-0.303134	1						78	3.90282	-0.603798	-0.276077		-0.303134		0	0	0	1	0		1
Suspect8269	74	314	41			Suspect8269	0.030356	1						74	4.10971	-0.480001	0.0284937		0.030356		0	0	0	1	0		1
