# Supplementary material for: Combined indicator of vitamin B12 status: modification for missing biomarkers and folate status and recommendations for revised cut-points
Source: publisher site journal article supplement (doi:10.1515/cclm-2014-0818), 2015-01-01
Supplement: Supplementary file 9 [file Calc_cB12_from_Hcy_&_MMA_(2015).xls]

## Sheet: B12 & Hcy
Calculation of cB12 indicator (former w) from Hcy & MMA									Vitamin B12 status classification
Further information can be obtained from:									2 = elevated B12
Sergey Fedosov (snf@mb.au.dk) or Alex Brito (abrito@ucdavis.edu)									1 = adequate B12 status
									-1 = decreased B12 (start B12 supplements)
Use Hcy and MMA.									-2 = possibly B12 deficient (start oral B12)
Make an input into the blue fields.									-3 = probably B12 deficient (start B12 injections)
Leave age & folate cells empty (or enter X =< 0) if measurements are absent.
Read cB12 and diagnosis of B12 status in the red fields.
	age	folate	Hcy	MMA											if 0, then 50							Diagnosis
ID	years	nM	µM	µM			ID	cB12 (w)	Diagnosis code						age	Log(1/H/M)	Log(B*T)	raw W	+dWfol	W correct		w < -2.5	-2.5 to -1.5	-1.5 to -0.5	-0.5 to 1.5	1.5 =< w		Result
Suspect5348	48		8.6	0.04			Suspect5348	2.13609	2						48	0.463442	4.66045	1.39729	0	2.13609		0	0	0	0	2		2
Suspect2584	57		5.9	0.16			Suspect2584	0.931659	1						57	0.025028	4.37877	0.711973	0	0.931659		0	0	0	1	0		1
Suspect9202	88		16.2	0.83			Suspect9202	-1.02438	-1						88	-1.12859	3.86478	-0.765759	0	-1.02438		0	0	-1	0	0		-1
Suspect8401	74		10.5	0.23			Suspect8401	0.218843	1						74	-0.382917	4.20989	0.22575	0	0.218843		0	0	0	1	0		1
Suspect4136	76		7.5	0.32			Suspect4136	0.267331	1						76	-0.380211	4.22932	0.260725	0	0.267331		0	0	0	1	0		1
Suspect5045	47		5.1	0.23			Suspect5045	0.574807	1						47	-0.069298	4.27528	0.476054	0	0.574807		0	0	0	1	0		1
Suspect3455	25		5.4	0.74			Suspect3455	-0.735593	-1						25	-0.601625	3.86066	-0.519178	0	-0.735593		0	0	-1	0	0		-1
Suspect8672	88		9.9	0.26			Suspect8672	0.492243	1						88	-0.410609	4.33188	0.419329	0	0.492243		0	0	0	1	0		1
Suspect8499	65		4.9	0.2			Suspect8499	1.01646	1						65	0.00877392	4.41035	0.765825	0	1.01646		0	0	0	1	0		1
Suspect5028	39		7	0.2			Suspect5028	0.328675	1						39	-0.146128	4.2035	0.304575	0	0.328675		0	0	0	1	0		1
Suspect5068	56		27.9	0.1			Suspect5068	-0.214147	1						56	-0.445604	4.04286	-0.0988732	0	-0.214147		0	0	0	1	0		1
Suspect5540	57		10.3	0.64			Suspect5540	-0.977537	-1						57	-0.819017	3.78575	-0.725092	0	-0.977537		0	0	-1	0	0		-1
Suspect425	51		10.3	1.2			Suspect425	-1.55993	-2						51	-1.09202	3.55893	-1.24908	0	-1.55993		0	-2	0	0	0		-2
Suspect5500	55		24.8	0.09			Suspect5500	-0.00963847	1						55	-0.348694	4.10622	0.0572086	0	-0.00963847		0	0	0	1	0		1
Suspect8059	76		7.9	0.15			Suspect8059	1.02752	1						76	-0.0737184	4.43489	0.772786	0	1.02752		0	0	0	1	0		1
Suspect9284	74		9.1	0.92			Suspect9284	-0.92303	-1						74	-0.922829	3.84595	-0.678099	0	-0.92303		0	0	-1	0	0		-1
Suspect1594	41		6.4	0.14			Suspect1594	0.832342	1						41	0.047692	4.34781	0.647823	0	0.832342		0	0	0	1	0		1
Suspect4059	69		7.7	0.28			Suspect4059	0.235754	1						69	-0.333649	4.20293	0.237979	0	0.235754		0	0	0	1	0		1
Suspect5077	25		9.6	0.27			Suspect5077	-0.329405	1						25	-0.413635	4.00283	-0.189013	0	-0.329405		0	0	0	1	0		1
Suspect8235	50		4.7	0.24			Suspect8235	0.646339	1						50	-0.0523091	4.2965	0.524549	0	0.646339		0	0	0	1	0		1
Suspect8678	53		9.9	0.27			Suspect8678	-0.207688	1						53	-0.426999	4.04151	-0.0938683	0	-0.207688		0	0	0	1	0		1
Suspect9137	75		9.8	0.35			Suspect9137	-0.103761	1						75	-0.535294	4.11614	-0.0140129	0	-0.103761		0	0	0	1	0		1
Suspect9262	49		10.9	0.49			Suspect9262	-0.879748	-1						49	-0.727623	3.80977	-0.641034	0	-0.879748		0	0	-1	0	0		-1
Suspect9310	82		11.9	0.59			Suspect9310	-0.609537	-1						82	-0.846399	3.97894	-0.414631	0	-0.609537		0	0	-1	0	0		-1
Suspect5012	39		4.9	0.11			Suspect5012	1.44137	1						39	0.268411	4.50727	1.02289	0	1.44137		0	0	0	1	0		1
Suspect5574	41		6.9	0.04			Suspect5574	2.41646	2						41	0.559091	4.72085	1.53226	0	2.41646		0	0	0	0	2		2
Suspect8326	43		8.7	0.43			Suspect8326	-0.609904	-1						43	-0.572988	3.90023	-0.414933	0	-0.609904		0	0	-1	0	0		-1
Suspect8579	88		21.6	2.5			Suspect8579	-2.0916	-2						88	-1.73239	3.47196	-1.76238	0	-2.0916		0	-2	0	0	0		-2
Suspect8718	35		5.3	0.2			Suspect8718	0.613253	1						35	-0.0253059	4.28935	0.502193	0	0.613253		0	0	0	1	0		1
Suspect8748	55		9.1	0.22			Suspect8748	0.0985478	1						55	-0.301464	4.13957	0.137781	0	0.0985478		0	0	0	1	0		1
Suspect9157	73		6	0.47			Suspect9157	0.0451164	1						73	-0.450249	4.15587	0.0981601	0	0.0451164		0	0	0	1	0		1
Suspect596	86		16.2	0.51			Suspect596	-0.660094	-1						86	-0.917085	3.97821	-0.456336	0	-0.660094		0	0	-1	0	0		-1
Suspect5467	60		6.6	0.24			Suspect5467	0.405038	1						60	-0.199755	4.23652	0.358542	0	0.405038		0	0	0	1	0		1
Suspect8079	41		5.8	0.16			Suspect8079	0.792051	1						41	0.032452	4.3367	0.621466	0	0.792051		0	0	0	1	0		1
Suspect8252	37		6.6	0.47			Suspect8252	-0.471319	1						37	-0.491642	3.947	-0.302153	0	-0.471319		0	0	0	1	0		1
Suspect8754	43		4.1	0.12			Suspect8754	1.58646	2						43	0.308035	4.53993	1.10579	0	1.58646		0	0	0	0	2		2
Suspect5010	22		4.1	0.14			Suspect5010	1.34238	1						22	0.241088	4.50536	0.964905	0	1.34238		0	0	0	1	0		1
Suspect5265	28		3.4	0.21			Suspect5265	1.06028	1						28	0.146302	4.42121	0.79332	0	1.06028		0	0	0	1	0		1
Suspect5428	50		13.7	0.12			Suspect5428	0.244229	1						50	-0.215902	4.17964	0.244096	0	0.244229		0	0	0	1	0		1
Suspect8145	78		8.7	0.73			Suspect8145	-0.606648	-1						78	-0.802842	3.96568	-0.412257	0	-0.606648		0	0	-1	0	0		-1
Suspect8269	74		10.3	0.26			Suspect8269	0.115927	1						74	-0.427811	4.17962	0.150595	0	0.115927		0	0	0	1	0		1
