# Supplementary material for: Combined indicator of vitamin B12 status: modification for missing biomarkers and folate status and recommendations for revised cut-points
Source: publisher site journal article supplement (doi:10.1515/cclm-2014-0818), 2015-01-01
Supplement: Supplementary file 11 [file Calc_cB12_from_holoTC_&_Hcy_(2015).xls]

## Sheet: B12 & MMA
Calculation of cB12 indicator (former w) from holoTC & Hcy									Vitamin B12 status classification
Further information can be obtained from:									2 = elevated B12
Sergey Fedosov (snf@mb.au.dk) or Alex Brito (abrito@ucdavis.edu)									1 = adequate B12 status
									-1 = decreased B12 (start B12 supplements)
Use holoTC and Hcy.									-2 = possibly B12 deficient (start oral B12)
Make an input into the blue fields.									-3 = probably B12 deficient (start B12 injections)
Leave age & folate cells empty (or enter X =< 0) if measurements are absent.
Read cB12 and diagnosis of B12 status in the red fields.
	age	folate	holoTC	Hcy											if 0, then 50							Diagnosis
ID	years	nM	pM	µM			ID	cB12 (w)	Diagnosis code						age	Log(T/H)	Log(B/M)	raw W	+dWfol	W correct		w < -2.5	-2.5 to -1.5	-1.5 to -0.5	-0.5 to 1.5	1.5 =< w		Result
Suspect5348	48		201	8.6			Suspect5348	1.30391	1						48	1.3687	3.56663	1.20873	0	1.30391		0	0	0	1	0		1
Suspect2584	57		21	5.9			Suspect2584	-0.240435	1						57	0.551367	2.93213	-0.20832	0	-0.240435		0	0	0	1	0		1
Suspect9202	88		27	16.2			Suspect9202	-0.815779	-1						88	0.221849	2.54386	-0.736239	0	-0.815779		0	0	-1	0	0		-1
Suspect8401	74		65	10.5			Suspect8401	0.269575	1						74	0.791724	3.06914	0.25965	0	0.269575		0	0	0	1	0		1
Suspect4136	76		54	7.5			Suspect4136	0.404817	1						76	0.857332	3.1148	0.383744	0	0.404817		0	0	0	1	0		1
Suspect5045	47		72	5.1			Suspect5045	0.896031	1						47	1.14976	3.41463	0.834466	0	0.896031		0	0	0	1	0		1
Suspect3455	25		14	5.4			Suspect3455	-0.484172	1						25	0.413734	2.93251	-0.431966	0	-0.484172		0	0	0	1	0		1
Suspect8672	88		28	9.9			Suspect8672	-0.347072	1						88	0.451523	2.74426	-0.306167	0	-0.347072		0	0	0	1	0		1
Suspect8499	65		361	4.9			Suspect8499	2.26136	2						65	1.86731	3.87324	2.08725	0	2.26136		0	0	0	0	2		2
Suspect5028	39		38	7			Suspect5028	0.111449	1						39	0.734686	3.13267	0.114558	0	0.111449		0	0	0	1	0		1
Suspect5068	56		34	27.9			Suspect5068	-1.17341	-1						56	0.0858747	2.54587	-1.06439	0	-1.17341		0	0	-1	0	0		-1
Suspect5540	57		15	10.3			Suspect5540	-1.01514	-1						57	0.163254	2.6094	-0.919166	0	-1.01514		0	0	-1	0	0		-1
Suspect425	51		50	10.3			Suspect425	0.0171252	1						51	0.686133	3.05787	0.0280092	0	0.0171252		0	0	0	1	0		1
Suspect5500	55		42	24.8			Suspect5500	-0.883531	-1						55	0.228798	2.67312	-0.798405	0	-0.883531		0	0	-1	0	0		-1
Suspect8059	76		70	7.9			Suspect8059	0.579586	1						76	0.947471	3.18502	0.544106	0	0.579586		0	0	0	1	0		1
Suspect9284	74		32	9.1			Suspect9284	-0.213897	1						74	0.546109	2.87114	-0.18397	0	-0.213897		0	0	0	1	0		1
Suspect1594	41		120	6.4			Suspect1594	1.12231	1						41	1.273	3.51678	1.04209	0	1.12231		0	0	0	1	0		1
Suspect4059	69		100	7.7			Suspect4059	0.87227	1						69	1.11351	3.33045	0.812664	0	0.87227		0	0	0	1	0		1
Suspect5077	25		44	9.6			Suspect5077	-0.00837364	1						25	0.661181	3.12164	0.00461225	0	-0.00837364		0	0	0	1	0		1
Suspect8235	50		64	4.7			Suspect8235	0.869347	1						50	1.13408	3.39554	0.809982	0	0.869347		0	0	0	1	0		1
Suspect8678	53		59	9.9			Suspect8678	0.190567	1						53	0.775217	3.12031	0.187154	0	0.190567		0	0	0	1	0		1
Suspect9137	75		61	9.8			Suspect9137	0.27784	1						75	0.794104	3.06799	0.267233	0	0.27784		0	0	0	1	0		1
Suspect9262	49		5.4	10.9			Suspect9262	-1.98723	-2						49	-0.305033	2.21708	-1.81113	0	-1.98723		0	-2	0	0	0		-2
Suspect9310	82		31	11.9			Suspect9310	-0.445735	1						82	0.415815	2.73466	-0.396697	0	-0.445735		0	0	0	1	0		1
Suspect5012	39		64	4.9			Suspect5012	0.830898	1						39	1.11598	3.41151	0.774702	0	0.830898		0	0	0	1	0		1
Suspect5574	41		43	6.9			Suspect5574	0.224743	1						41	0.794619	3.17158	0.218513	0	0.224743		0	0	0	1	0		1
Suspect8326	43		33	8.7			Suspect8326	-0.190794	1						43	0.578995	3.00041	-0.162771	0	-0.190794		0	0	0	1	0		1
Suspect8579	88		55	21.6			Suspect8579	-0.439421	1						88	0.405909	2.70513	-0.390903	0	-0.439421		0	0	0	1	0		1
Suspect8718	35		65	5.3			Suspect8718	0.781685	1						35	1.08864	3.40276	0.729546	0	0.781685		0	0	0	1	0		1
Suspect8748	55		139	9.1			Suspect8748	0.96992	1						55	1.18397	3.41861	0.902264	0	0.96992		0	0	0	1	0		1
Suspect9157	73		81	6			Suspect9157	0.918827	1						73	1.13033	3.33251	0.855384	0	0.918827		0	0	0	1	0		1
Suspect596	86		14	16.2			Suspect596	-1.42023	-1						86	-0.063387	2.28999	-1.29086	0	-1.42023		0	0	-1	0	0		-1
Suspect5467	60		37	6.6			Suspect5467	0.148669	1						60	0.748658	3.07828	0.14871	0	0.148669		0	0	0	1	0		1
Suspect8079	41		63	5.8			Suspect8079	0.680923	1						41	1.03591	3.34886	0.63709	0	0.680923		0	0	0	1	0		1
Suspect8252	37		32	6.6			Suspect8252	0.0192041	1						37	0.685606	3.10182	0.0299167	0	0.0192041		0	0	0	1	0		1
Suspect8754	43		230	4.1			Suspect8754	1.99265	2						43	1.74894	3.83393	1.84069	0	1.99265		0	0	0	0	2		2
Suspect5010	22		41	4.1			Suspect5010	0.634217	1						22	1	3.37577	0.594234	0	0.634217		0	0	0	1	0		1
Suspect5265	28		54	3.4			Suspect5265	0.995822	1						28	1.20091	3.49931	0.926031	0	0.995822		0	0	0	1	0		1
Suspect5428	50		46	13.7			Suspect5428	-0.294865	1						50	0.526037	2.93534	-0.258264	0	-0.294865		0	0	0	1	0		1
Suspect8145	78		41	8.7			Suspect8145	0.0520864	1						78	0.673265	2.96192	0.0600885	0	0.0520864		0	0	0	1	0		1
Suspect8269	74		41	10.3			Suspect8269	-0.107158	1						74	0.599947	2.91524	-0.0860289	0	-0.107158		0	0	0	1	0		1
