# Supplementary material for: Combined indicator of vitamin B12 status: modification for missing biomarkers and folate status and recommendations for revised cut-points
Source: publisher site journal article supplement (doi:10.1515/cclm-2014-0818), 2015-01-01
Supplement: Supplementary file 13 [file Calc_cB12_from_holoTC_&_MMA_(2015).xls]

## Sheet: B12 & MMA
Calculation of cB12 indicator (former w) from holoTC & MMA								Vitamin B12 status classification
Further information can be obtained from:								2 = elevated B12
Sergey Fedosov (snf@mb.au.dk) or Alex Brito (abrito@ucdavis.edu)								1 = adequate B12 status
								-1 = decreased B12 (start B12 supplements)
Use holoTC and MMA.								-2 = possibly B12 deficient (start oral B12)
Make an input into the blue fields. Correction for folate is unnecessary.								-3 = probably B12 deficient (start B12 injections)
Leave age cells empty (or enter X =< 0) if measurements are absent.
Read cB12 and diagnosis of B12 status in the red fields.
	age	holoTC	MMA											if 0, then 50							Diagnosis
ID	years	pM	µM			ID	cB12 (w)	Diagnosis code						age	Log(T/M)	Log(B/H)	raw W		W correct		w < -2.5	-2.5 to -1.5	-1.5 to -0.5	-0.5 to 1.5	1.5 =< w		Result
Suspect5348	48	201	0.04			Suspect5348	2.09294	2						48	3.70114	2.00009	1.97462		2.09294		0	0	0	0	2		2
Suspect2584	57	21	0.16			Suspect2584	-0.358472	1						57	2.1181	1.24615	-0.32757		-0.358472		0	0	0	1	0		1
Suspect9202	88	27	0.83			Suspect9202	-1.18691	-1						88	1.51229	0.884089	-1.10557		-1.18691		0	0	-1	0	0		-1
Suspect8401	74	65	0.23			Suspect8401	0.190313	1						74	2.45119	1.33784	0.187808		0.190313		0	0	0	1	0		1
Suspect4136	76	54	0.32			Suspect4136	-0.144092	1						76	2.22724	1.2349	-0.12624		-0.144092		0	0	0	1	0		1
Suspect5045	47	72	0.23			Suspect5045	0.23651	1						47	2.4956	1.46552	0.231193		0.23651		0	0	0	1	0		1
Suspect3455	25	14	0.74			Suspect3455	-1.78404	-2						25	1.2769	0.83496	-1.66636		-1.78404		0	-2	0	0	0		-2
Suspect8672	88	28	0.26			Suspect8672	-0.388222	1						88	2.03218	1.11425	-0.355509		-0.388222		0	0	0	1	0		1
Suspect8499	65	361	0.2			Suspect8499	1.3886	1						65	3.25648	1.70997	1.31315		1.3886		0	0	0	1	0		1
Suspect5028	39	38	0.2			Suspect5028	-0.102726	1						39	2.27875	1.38665	-0.087392		-0.102726		0	0	0	1	0		1
Suspect5068	56	34	0.1			Suspect5068	0.289643	1						56	2.53148	1.44574	0.281091		0.289643		0	0	0	1	0		1
Suspect5540	57	15	0.64			Suspect5540	-1.57163	-2						57	1.36991	0.85503	-1.46688		-1.57163		0	-2	0	0	0		-2
Suspect425	51	50	1.2			Suspect425	-1.17368	-1						51	1.61979	1.00305	-1.09315		-1.17368		0	0	-1	0	0		-1
Suspect5500	55	42	0.09			Suspect5500	0.503136	1						55	2.66901	1.5129	0.481588		0.503136		0	0	0	1	0		1
Suspect8059	76	70	0.15			Suspect8059	0.522436	1						76	2.66901	1.41909	0.499713		0.522436		0	0	0	1	0		1
Suspect9284	74	32	0.92			Suspect9284	-1.2222	-1						74	1.54136	0.921137	-1.13872		-1.2222		0	0	-1	0	0		-1
Suspect1594	41	120	0.14			Suspect1594	0.935497	1						41	2.93305	1.70226	0.887629		0.935497		0	0	0	1	0		1
Suspect4059	69	100	0.28			Suspect4059	0.33402	1						69	2.55284	1.40123	0.322767		0.33402		0	0	0	1	0		1
Suspect5077	25	44	0.27			Suspect5077	-0.188179	1						25	2.21209	1.39848	-0.167643		-0.188179		0	0	0	1	0		1
Suspect8235	50	64	0.24			Suspect8235	0.124813	1						50	2.42597	1.41997	0.126295		0.124813		0	0	0	1	0		1
Suspect8678	53	59	0.27			Suspect8678	-0.0116748	1						53	2.33949	1.36701	-0.00188376		-0.0116748		0	0	0	1	0		1
Suspect9137	75	61	0.35			Suspect9137	-0.125975	1						75	2.24126	1.24437	-0.109226		-0.125975		0	0	0	1	0		1
Suspect9262	49	5.4	0.49			Suspect9262	-2.15346	-2						49	1.0422	0.66769	-2.01329		-2.15346		0	-2	0	0	0		-2
Suspect9310	82	31	0.59			Suspect9310	-0.898309	-1						82	1.72051	0.992114	-0.834544		-0.898309		0	0	-1	0	0		-1
Suspect5012	39	64	0.11			Suspect5012	0.675376	1						39	2.76479	1.63135	0.643343		0.675376		0	0	0	1	0		1
Suspect5574	41	43	0.04			Suspect5574	1.0894	1						41	3.03141	1.74844	1.03216		1.0894		0	0	0	1	0		1
Suspect8326	43	33	0.43			Suspect8326	-0.74625	-1						43	1.88505	1.16539	-0.691742		-0.74625		0	0	-1	0	0		-1
Suspect8579	88	55	2.5			Suspect8579	-1.45428	-1						88	1.34242	0.80285	-1.35667		-1.45428		0	0	-1	0	0		-1
Suspect8718	35	65	0.2			Suspect8718	0.280367	1						35	2.51188	1.52235	0.27238		0.280367		0	0	0	1	0		1
Suspect8748	55	139	0.22			Suspect8748	0.706258	1						55	2.80059	1.57207	0.672345		0.706258		0	0	0	1	0		1
Suspect9157	73	81	0.47			Suspect9157	-0.13961	1						73	2.23639	1.24905	-0.122031		-0.13961		0	0	0	1	0		1
Suspect596	86	14	0.51			Suspect596	-1.31602	-1						86	1.43856	0.852077	-1.22682		-1.31602		0	0	-1	0	0		-1
Suspect5467	60	37	0.24			Suspect5467	-0.24389	1						60	2.18799	1.27027	-0.219963		-0.24389		0	0	0	1	0		1
Suspect8079	41	63	0.16			Suspect8079	0.402158	1						41	2.59522	1.53922	0.386757		0.402158		0	0	0	1	0		1
Suspect8252	37	32	0.47			Suspect8252	-0.83282	-1						37	1.83305	1.15142	-0.773042		-0.83282		0	0	-1	0	0		-1
Suspect8754	43	230	0.12			Suspect8754	1.47289	1						43	3.28255	1.85194	1.39231		1.47289		0	0	0	1	0		1
Suspect5010	22	41	0.14			Suspect5010	0.241329	1						22	2.46666	1.5506	0.235719		0.241329		0	0	0	1	0		1
Suspect5265	28	54	0.21			Suspect5265	0.131423	1						28	2.41017	1.49652	0.132503		0.131423		0	0	0	1	0		1
Suspect5428	50	46	0.12			Suspect5428	0.372716	1						50	2.58358	1.49517	0.359108		0.372716		0	0	0	1	0		1
Suspect8145	78	41	0.73			Suspect8145	-0.873688	-1						78	1.74946	1.01421	-0.811422		-0.873688		0	0	-1	0	0		-1
Suspect8269	74	41	0.26			Suspect8269	-0.195673	1						74	2.19781	1.22873	-0.174681		-0.195673		0	0	0	1	0		1
