# Supplementary material for: Combined indicator of vitamin B12 status: modification for missing biomarkers and folate status and recommendations for revised cut-points
Source: publisher site journal article supplement (doi:10.1515/cclm-2014-0818), 2015-01-01
Supplement: Supplementary file 15 [file _Supplemental_Materials,_Fedosov.doc]

**Supplemental materials to:**

**Combined indicator of vitamin B12 status: modification for missing biomarkers and folate status, and recommendations for revised cut-points.**

Sergey N. Fedosov*, Alex Brito, Joshua W. Miller, Ralph Green, Lindsay H. Allen

Supplementary Table S1. Analytical methods used in each study

| Study | B12 | tHcy | MMA | HoloTC | folate |
| --- | --- | --- | --- | --- | --- |
| Hvas et al  2007 | Enzyme-linked immunosorbent assay | Chemiluminescence immunoassay | Gas  chromatography–mass spectrometry | Enzyme-linked immunosorbent assay | Chemiluminescence immunoassay |
| Hvas et al  2005 | Competitive protein binding assay | Immunological method | Gas  chromatography–mass spectrometry | Competitive protein binding assay | Competitive protein binding assay |
| Lloyd-Wright et al  2003 | Microbiological  assay | Gas  chromatography–mass spectrometry | Gas  chromatography–mass spectrometry | Enzyme-linked immunosorbent assay | Microbiological  assay |
| Hin et al  2006 | Microbiological  assay | Gas  chromatography–mass spectrometry | Gas  chromatography–mass spectrometry | Radioimmunoassay | Microbiological  assay |
| Campbell et al  2003 | Radioimmunoassay | High performance liquid chromatography mass spectrometry | Gas  chromatography–mass spectrometry | ELISA | Radioimmunoassay |
| Sanchez et al  2011 | Radioimmunoassay | High performance liquid chromatography mass spectrometry | High performance liquid chromatography mass spectrometry | Radioimmunoassay | Radioimmunoassay |
| Stone et al  2011 | Microbiological  assay | Not found | Not found | Enzyme Immunoassay | Microbiological  assay |
| Shahab-Ferdows et al  2012 | Radioimmunoassay | High performance liquid chromatography mass spectrometry | High performance liquid chromatography mass spectrometry | Radioimmunoassay | Radioimmunoassay |
| Stabler et al  1988 | Microbiological  assay | Gas  chromatography–mass spectrometry | Not found | Not found | Radioimmunoassay |

**Supplementary Table S2.** Calculation of the “incomplete” indicator cB12 for rare combinations of missing markers

| № | Missing  markers, Z | Measured  markers, X | Equation Ztheor = F(X,Y), Y = age  (slope of Zreal vs Ztheor) | cB12  corrected a) | σcB12b) |
| --- | --- | --- | --- | --- | --- |
| S1 |  |  | (slope 1.000000001) | Linear:  *A*1 = 0.0052  A2 = 0.917 | 0.274  (1.020) |
| S2 |  |  | (slope 1.00011) | Quadratic:  *A*1 = 5.43∙10-4  *A*2 = 0.920  *A*3 = 0.0246 | 0.275  (1.031) |
| S3 |  |  | (slope 0.9999999994) | Quadratic:  *A*1 = 0.0644  *A*2 = 0.750  *A*3 = –0.0590 | 0.240  (best) |

a) Correction of “incomplete” indicators 3cB12 or 2cB12 compensates a systematic shift at the border values of cB12. This procedure slightly increases the average deviation σcB12 if compared to the smallest deviation σ*best* (usually at absent correction “0”). Correction was done using the following equations:

Linear: ; NcB12 = 3cB12 or 2cB12

Quadratic: ; NcB12 = 3cB12 or 2cB12

b) The average deviation of the predicted “incomplete” cB12 from the true values obtained in the complete four-variable test. The span 0 ± σcB12 covers 68% of all the points. Low σcB12 means better correspondence with the full test.

**Supplementary figure legends.**

**Supplementary Figure S1.** Prognosis of “partial” indicator at missing B12.

(A) Predictive surface, where B12 is expressed via holoTC, Hcy, MMA and age. The best fit (Ztheor function) is shown in Table 1, entry 1. (B) Validation of this function by plotting real B12 versus theoretical B12. The linear slope (solid line) is equal to 1.0000000003. Fit by smoothing splines is shown as a dashed line. (C) Alignment of the predicted “partial” indicator 3cB12 (without B12) with the complete four-variable indicator 4cB12. Assumption of 3cB12 or 4cB12 as *x*-axis gives two different fits: “0” (dashed line) and “1” (dotted line). Fit “2” shows the intermediate situation (solid line). Three respective sets of linear coefficients were used to correct the “incomplete” indicator cB12. (D) Residual plot (4cB12 – cB12) versus 4cB12. Residuals correspond to cB12 calculated according to correction “0” (red), “1” (green) and “2” (blue). Solid lines show the smoothing splines of the respective datasets. The average deviations σcB12 are equal to 0.175 (set “0”), 0.181 (set “1”) and 0.176 (set “2”).

**Supplementary Figure S2.** Prognosis of “partial” indicator at missing Hcy.

(A) Predictive surface, whereHcy is expressed via B12, holoTC, MMA and age. The best fit (Ztheor function) is shown in Table 1, entry 3. (B) Validation of this function by plotting real Hcy versus theoretical Hcy. The linear slope (solid line) is equal to 1.0000000003. Fit by smoothing splines is shown as a dashed line. (C) Alignment of the predicted “partial” indicator 3cB12 (without Hcy) with the complete four-variable indicator 4cB12. Assumption of 3cB12 or 4cB12 as *x*-axis gives two different fits: “0” (dashed line) and “1” (dotted line). Fit “2” shows the intermediate situation (solid line). Three respective sets of linear coefficients were used to correct the “incomplete” indicator cB12. (D) Residual plot (4cB12 – cB12) versus 4cB12. Residuals correspond to cB12 calculated according to correction “0” (red), “1” (green) and “2” (blue). Solid lines show the smoothing splines of the respective datasets. The average deviations σcB12 are equal to 0.123 (set “0”), 0.125 (set “1”) and 0.123 (set “0”).

**Supplementary Figure S3.** Prognosis of “partial” indicator at missing MMA.

(A) Predictive surface, whereMMA is expressed via B12, holoTC, Hcy and age. The best fit (Ztheor function) is shown in Table 1, entry 5. (B) Validation of this function by plotting real MMA versus theoretical MMA. The linear slope (solid line) is equal to 1.000005. Fit by smoothing splines is shown as a dashed line. (C) Alignment of the predicted “partial” indicator 3cB12 (without MMA) with the complete four-variable indicator 4cB12. Assumption of 3cB12 or 4cB12 as *x*-axis gives two different fits: “0” (dashed line) and “1” (dotted line). Fit “2” shows the intermediate situation (solid line). Three respective sets of linear coefficients were used to correct the “incomplete” indicator cB12. (D) Residual plot (4cB12 – cB12) versus 4cB12. Residuals correspond to cB12 calculated according to correction “0” (red), “1” (green) and “2” (blue). Solid lines show the smoothing splines of the respective datasets. The average deviations σcB12 are equal to 0.196 (set “0”), 0.205 (set “1”) and 0.198 (set “2”).

**Supplementary Figure S4.** Prognosis of “partial” indicator at missing holoTC and MMA.

(A) Predictive surface, where ratio of holoTC / MMA is expressed via ratio of B12 / Hcy and age. The best fit (Ztheor function) is shown in Table 1, entry 6. (B) Validation of this function by plotting real holoTC / MMA versus theoretical holoTC / MMA. The linear slope (solid line) is equal to 1.000000003. Fit by smoothing splines is shown as a dashed line. (C) Alignment of the predicted “partial” indicator 2cB12 (without holoTC and MMA) with the complete four-variable indicator 4cB12. Assumption of 2cB12 or 4cB12 as *x*-axis gives two different fits: “0” (dashed line) and “1” (dotted line). Fit “2” shows the intermediate situation (solid line). Three respective sets of linear coefficients were used to correct the “incomplete” indicator cB12. (D) Residual plot (4cB12 – cB12) versus 4cB12. Residuals correspond to cB12 calculated according to correction “0” (red), “1” (green) and “2” (blue). Solid lines show the smoothing splines of the respective datasets. The average deviations σcB12 are equal to 0.309 (set “0”), 0.349 (set “1”) and 0.317 (set “2”).

**Supplementary Figure S5.** Prognosis of “partial” indicator at missing holoTC and Hcy.

(A) Predictive surface, where ratio of holoTC / Hcy is expressed via ratio of B12 / MMA and age. The best fit (Ztheor function) is shown in Table 1, entry 7. (B) Validation of this function by plotting real holoTC / Hcy versus theoretical holoTC / Hcy. The linear slope (solid line) is equal to 1.00000009. Fit by smoothing splines is shown as a dashed line. (C) Alignment of the predicted “partial” indicator 2cB12 (without holoTC and Hcy) with the complete four-variable indicator 4cB12. Assumption of 2cB12 or 4cB12 as *x*-axis gives two different fits: “0” (dashed line) and “1” (dotted line). Fit “2” shows the intermediate situation (solid line). Three respective sets of linear coefficients were used to correct the “incomplete” indicator cB12. (D) Residual plot (4cB12 – cB12) versus 4cB12. Residuals correspond to cB12 calculated according to correction “0” (red), “1” (green) and “2” (blue). Solid lines show the smoothing splines of the respective datasets. The average deviations σcB12 are equal to 0.236 (set “0”), 0.252 (set “1”) and 0.240 (set “2”).

**Supplementary Figure S6.** Prognosis of “partial” indicator at missing B12 and Hcy.

(A) Predictive surface, where ratio of B12 / Hcy is expressed via ratio of holoTC / MMA and age. The best fit (Ztheor function) is shown in Table 1, entry 8. (B) Validation of this function by plotting real B12 / Hcy versus theoretical B12 / Hcy. The linear slope (solid line) is equal to 1.000000004. Fit by smoothing splines is shown as a dashed line. (C) Alignment of the predicted “partial” indicator 2cB12 (without holoTC and Hcy) with the complete four-variable indicator 4cB12. Assumption of 2cB12 or 4cB12 as *x*-axis gives two different fits: “0” (dashed line) and “1” (dotted line). Fit “2” shows the intermediate situation (solid line). Three respective sets of linear coefficients were used to correct the “incomplete” indicator cB12. (D) Residual plot (4cB12 – cB12) versus 4cB12. Residuals correspond to cB12 calculated according to correction “0” (red), “1” (green) and “2” (blue). Solid lines show the smoothing splines of the respective datasets. The average deviations σcB12 are equal to 0.231 (set “0”), 0.246 (set “1”) and 0.234 (set “2”).

**Supplementary Figure S7.** Prognosis of “partial” indicator at missing B12 and MMA.

(A) Predictive surface, where ratio of B12 / MMA is expressed via ratio of holoTC / Hcy and age. The best fit (Ztheor function) is shown in Table S1, entry S1. (B) Validation of this function by plotting real B12 / MMA versus theoretical B12 / MMA. The linear slope (solid line) is equal to 1.000000001. Fit by smoothing splines is shown as a dashed line. (C) Alignment of the predicted “partial” indicator 2cB12 (without B12 and MMA) with the complete four-variable indicator 4cB12. Assumption of 2cB12 or 4cB12 as *x*-axis gives two different fits: “0” (dashed line) and “1” (dotted line). Fit “2” shows the intermediate situation (solid line). Three respective sets of linear coefficients were used to correct the “incomplete” indicator cB12. (D) Residual plot (4cB12 – cB12) versus 4cB12. Residuals correspond to cB12 calculated according to correction “0” (red), “1” (green) and “2” (blue). Solid lines show the smoothing splines of the respective datasets. The average deviations σcB12 are equal to 0.269 (set “0”), 0.294 (set “1”) and 0.274 (set “2”).

**Supplementary Figure S8.** Prognosis of “partial” indicator at missing Hcy and MMA.

(A) Predictive surface, where product of (1/Hcy) ∙ (1/MMA) is expressed via product of B12 ∙ holoTC and age. The best fit (Ztheor function) is shown in Table S1, entry S2. (B) Validation of this function by plotting real (1/Hcy) ∙ (1/MMA) versus theoretical (1/Hcy) ∙ (1/MMA). The linear slope (solid line) is equal to 1.000116. Fit by smoothing splines is shown as a dashed line. (C) Alignment of the predicted “partial” indicator 2cB12 (without Hcy and MMA) with the complete four-variable indicator 4cB12. Assumption of 2cB12 or 4cB12 as *x*-axis gives two different fits: “0” (dashed line) and “1” (dotted line). Fit “2” shows the intermediate situation adjusted for deviation at low cB12 values (solid line): *y* = 0.000543 + 0.920∙*x* + 0.0246∙*x*2. Three respective sets of coefficients were used to correct the “incomplete” indicator cB12. (D) Residual plot (4cB12 – cB12) versus 4cB12. Residuals correspond to cB12 calculated according to correction “0” (red), “1” (green) and “2” (blue). Solid lines show the smoothing splines of the respective datasets. The average deviations σcB12 are equal to 0.267 (set “0”), 0.291 (set “1”) and 0.275 (set “2”).

**Supplementary Figure S9.** Prognosis of “partial” indicator at missing B12 and holoTC.

(A) Predictive surface, where product of B12 ∙ holoTC is expressed via product of (1/Hcy) ∙ (1/MMA) and age. The best fit (Ztheor function) is shown in Table S1, entry S3. (B) Validation of this function by plotting real B12 ∙ holoTC versus theoretical B12 ∙ holoTC. The linear slope (solid line) is equal to 0.9999999994. Fit by smoothing splines is shown as a dashed line. (C) Alignment of the predicted “partial” indicator 2cB12 (without Hcy and MMA) with the complete four-variable indicator 4cB12. Assumption of 2cB12 or 4cB12 as *x*-axis gives two different fits: “0” (dashed line) and “1” (dotted line). Fit “2” shows the intermediate situation adjusted for deviation at low cB12 values (solid line): *y* = 0.0644 + 0.750∙*x* – 0.0590∙*x*2. Three respective sets of coefficients were used to correct the “incomplete” indicator cB12. (D) Residual plot (4cB12 – cB12) versus 4cB12. Residuals correspond to cB12 calculated according to correction “0” (red), “1” (green) and “2” (blue). Solid lines show the smoothing splines of the respective datasets. The average deviations σcB12 are equal to 0.346 (set “0”), 0.405 (set “1”) and 0.240 (set “2”).

**Supplementary Figure S10.** Prediction of Hcy from B12 and MMA.

(A) Predictive surface, where ratio of Hcy is expressed via ratio of B12 / MMA and age. The best fit (Ztheor function) is shown in Table 1, entry 4. (B) Validation of this function by plotting real B12 / MMA versus theoretical B12 / MMA. The linear slope (solid line) is equal to 1.0000000003. Fit by smoothing splines is shown as a dashed line.
